# Supplementary material
Source: publisher site journal article supplement (https://www.dovepress.com/article/573167)
Supplement: Supplementary file 1 [file 573167%20Revised%20Supplementary%20material.docx]

**Supplementary material**

**Supplementary Table 1** Previous conventional and interventional therapies

| **Conventional and interventional therapies** | n=97 |
| --- | --- |
| Conventional, n (%) | 93 (96) |
| Physical therapy | 92 (95) |
| Rehabilitation | 54 (56) |
| TENS | 34 (35) |
| Psychological support | 25 (26) |
| Capsaicin | 15 (15) |
| Medication, n (%) | 97 (100) |
| Analgesics | 94 (97) |
| Opioids | 78 (80) |
| Co-analgesics | 82 (85) |
| Free radical scavengers | 80 (82) |
| Vasodilators | 37 (38) |
| Muscle relaxants and antispasmodics | 15 (15) |
| Corticosteroids | 9 (9) |
| Interventional, n (%) | 60 (62) |
| Sympathetic blockade | 41 (42) |
| Intravenous ketamine | 32 (33) |
| Neurostimulationa | 16 (16) |

aNeurostimulation refers to implantable devices (spinal cord stimulation or dorsal root ganglion stimulation)
